# Supplementary material for: Correlating negative thermal expansion and thermal conductivity in two-dimensional carbon-based materials
Source: Royal Society of Chemistry journal article supplement (doi:10.1039/d4cp03776f), 2024-01-01
Supplement: d4cp03776f1.pdf [file d4cp03776f1.pdf]

# SUPPORTING INFORMATION

## Correlating Negative Thermal Expansion and Thermal Conductivity in Two-dimensional Carbon-based Materials

Soumya Mondal and Ayan Datta\*

School of Chemical Sciences, Indian Association for the Cultivation of Science, Jadavpur –  
700032, West Bengal (India). Email: [spad@iacs.res.in](mailto:spad@iacs.res.in)

### Contents:

1. **Figure. S1.** Free energy-volume curve for the systems to obtain the equilibrium volume of a material.
2. **Figure. S2. (a)** First six phonon dispersion bands of the systems. **(b)** Full phonon band structures for the systems.
3. **Figure. S3.** Phonon lifetime vs frequency plots for the systems.
4. **Figure. S4.** Cumulative phonon lifetime vs frequency plots for the systems.
5. **Table ST1.** Maximum and minimum phonon group velocity ( $v_g$ ) and the corresponding frequency for the materials.
6. **Table ST2.** Comparison of experimental and theoretical TEC, TC (300 K) values with the present work.
7. Unit cell structures (POSCAR format) of the studied systems.

- Figure S1.** Free energy-volume curve for the systems to obtain the equilibrium volume of a material.

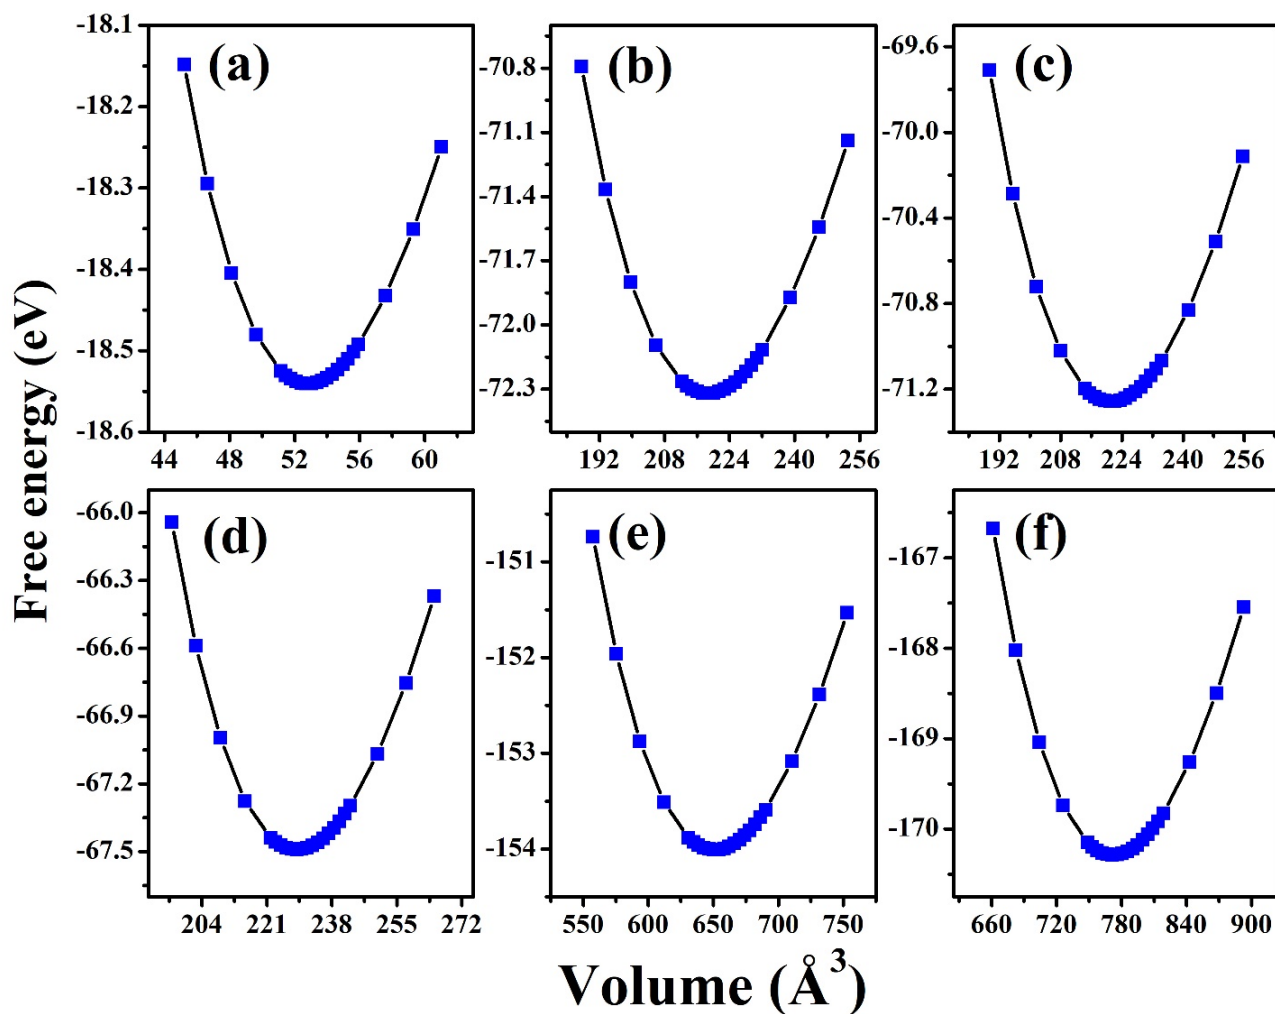

**Figure S1:** Energy-volume plots for (a) graphene (b) haeckelite (c) pentahexoctite (d) s\_graphene (e) 6.6.12-Gy and (f) delta-Gy.

2. **Figure. S2.** Phonon band structure shows stability of the 2D systems.

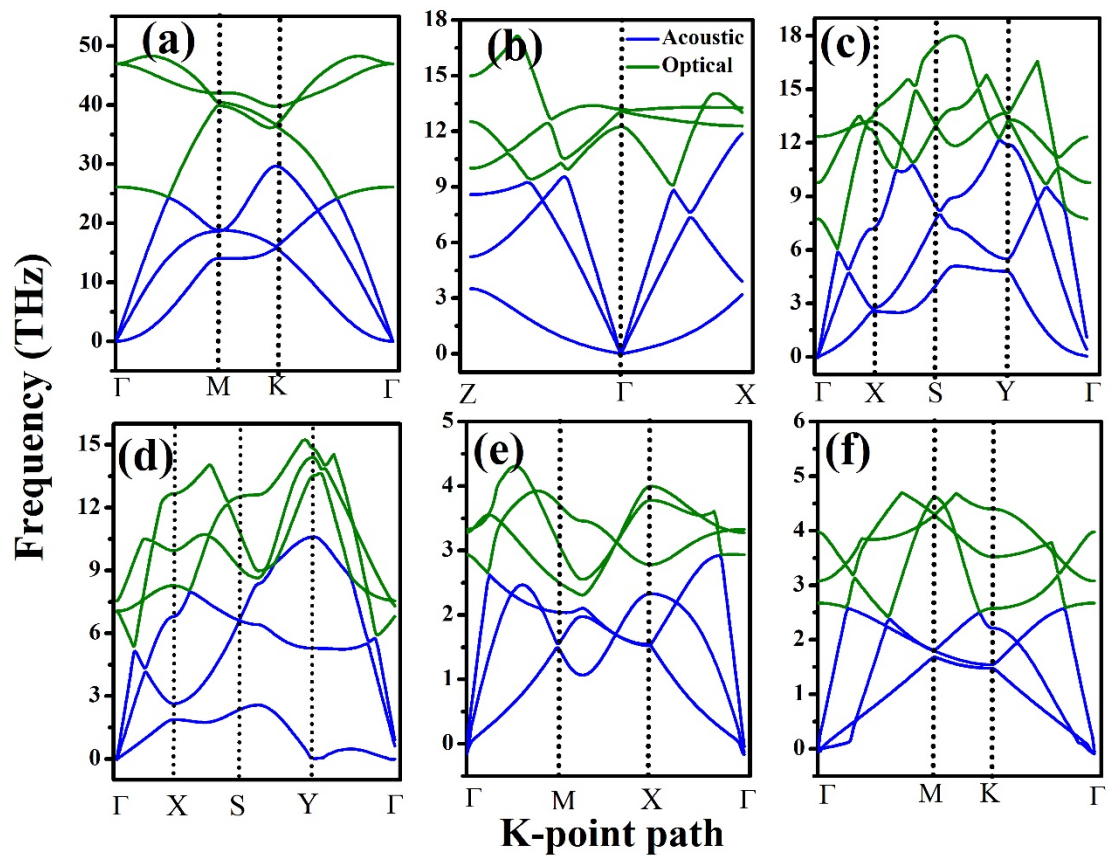

**Figure. S2.** (a) First six phonon dispersion bands of the structure (a) graphene (b) haeckelite (c) pentahexoctite (d) s-graphene (e) 6.6.12-Gy and (f) delta-Gy. Blue and green lines indicate acoustic and optical phonons respectively.

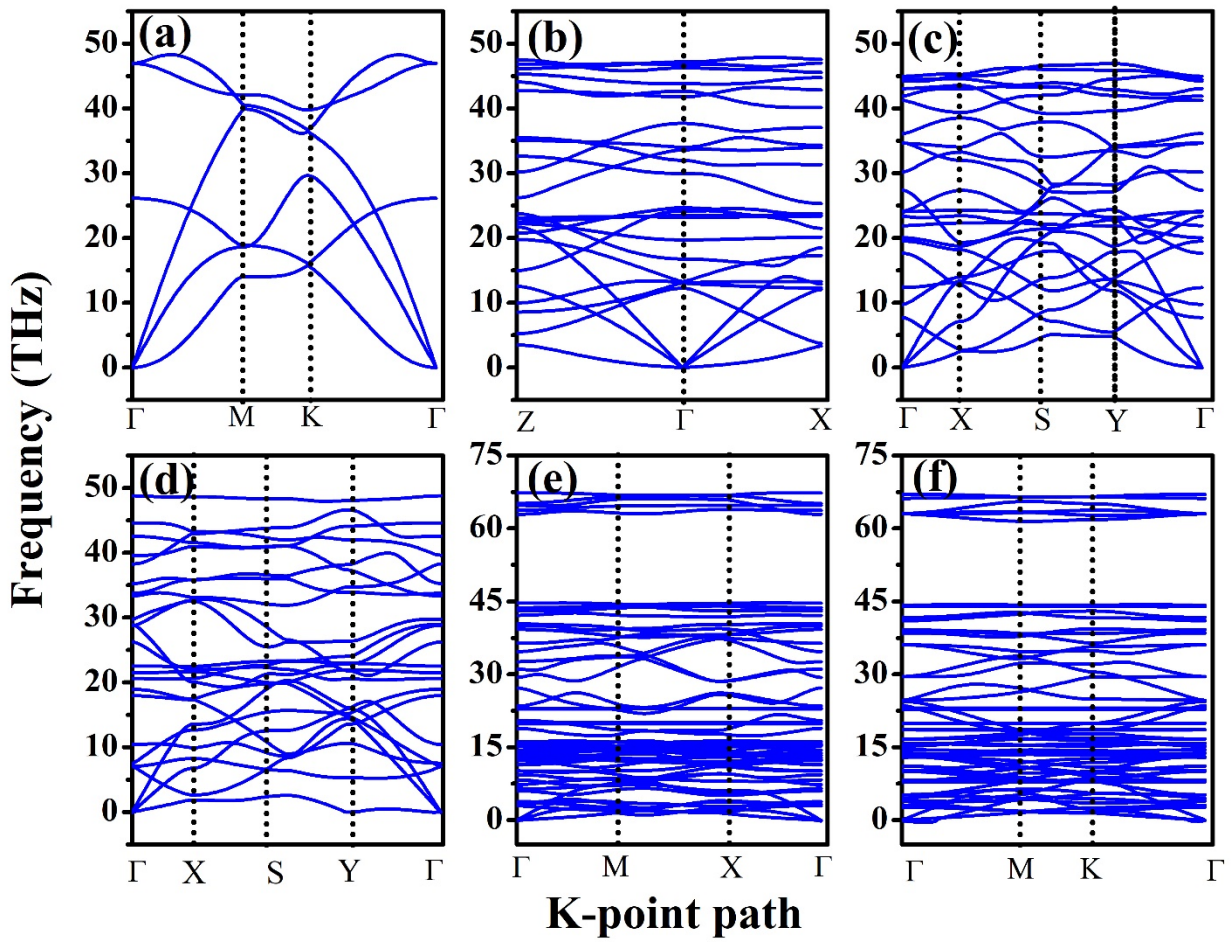

**Figure S2.** (b) Phonon dispersion bands show stability of the structure (a) graphene (b) haeckelite (c) pentahexoctite (d) s-graphene (e) 6.6.12-Gy and (f) delta-Gy.

### 3. Figure S3. Phonon lifetime vs frequency plots for the systems

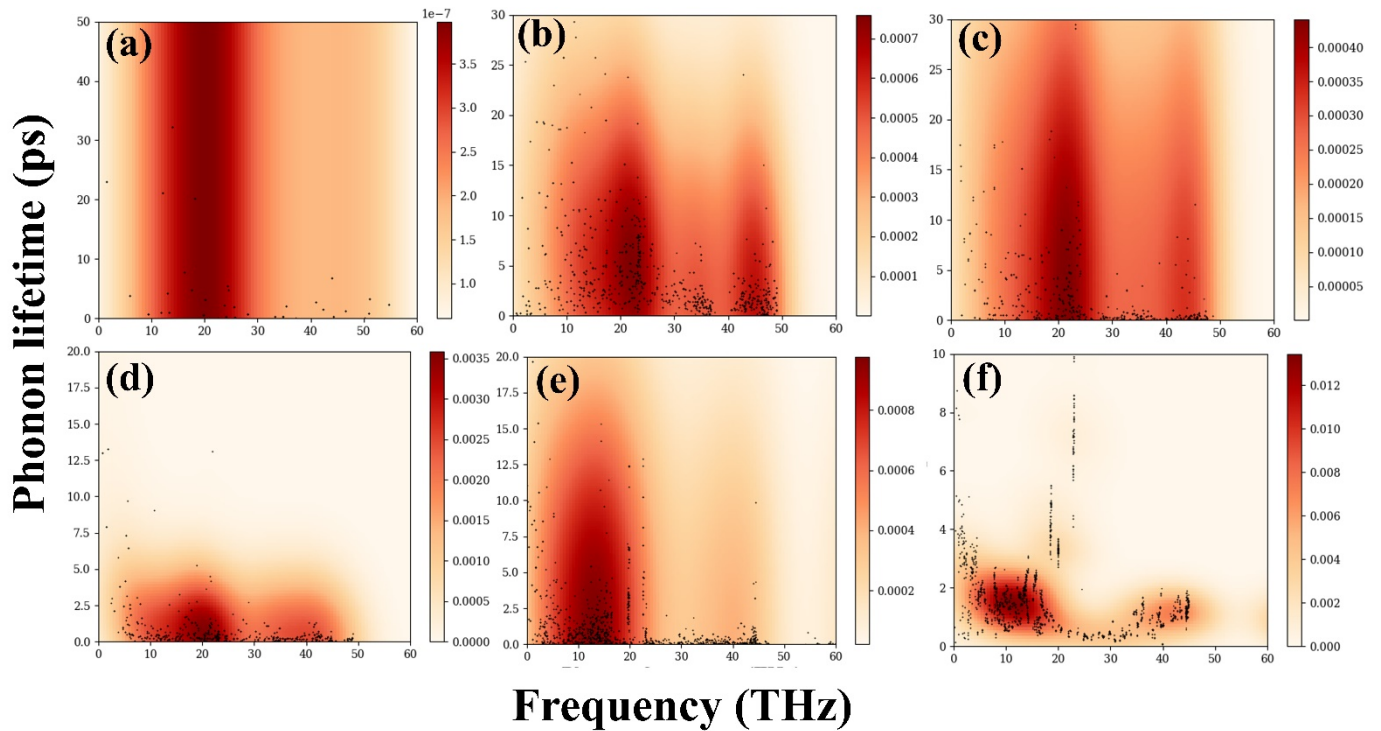

**Figure S3:** Phonon lifetime vs frequency plots for (a) graphene (b) haekelite (c) pentahexoctite (d) s-graphene (e) 6.6.12-Gy and (f) delta-Gy at 300K.

The plot draws density of phonon modes in the frequency-lifetime plane. The black dots show original data points. More density (Red colour) indicates more phonon lifetime. Highest density of phonon lifetime can be observed for graphene and the lowest is observed for delta-Gy. High phonon lifetime indicates that the phonons which are heat carriers remain stable for a long period and carry heat in a crystal. Hence, they are directly proportional to the thermal conductivity of a system.

4. **Figure. S4.** Cumulative phonon lifetime vs frequency plots for the systems.

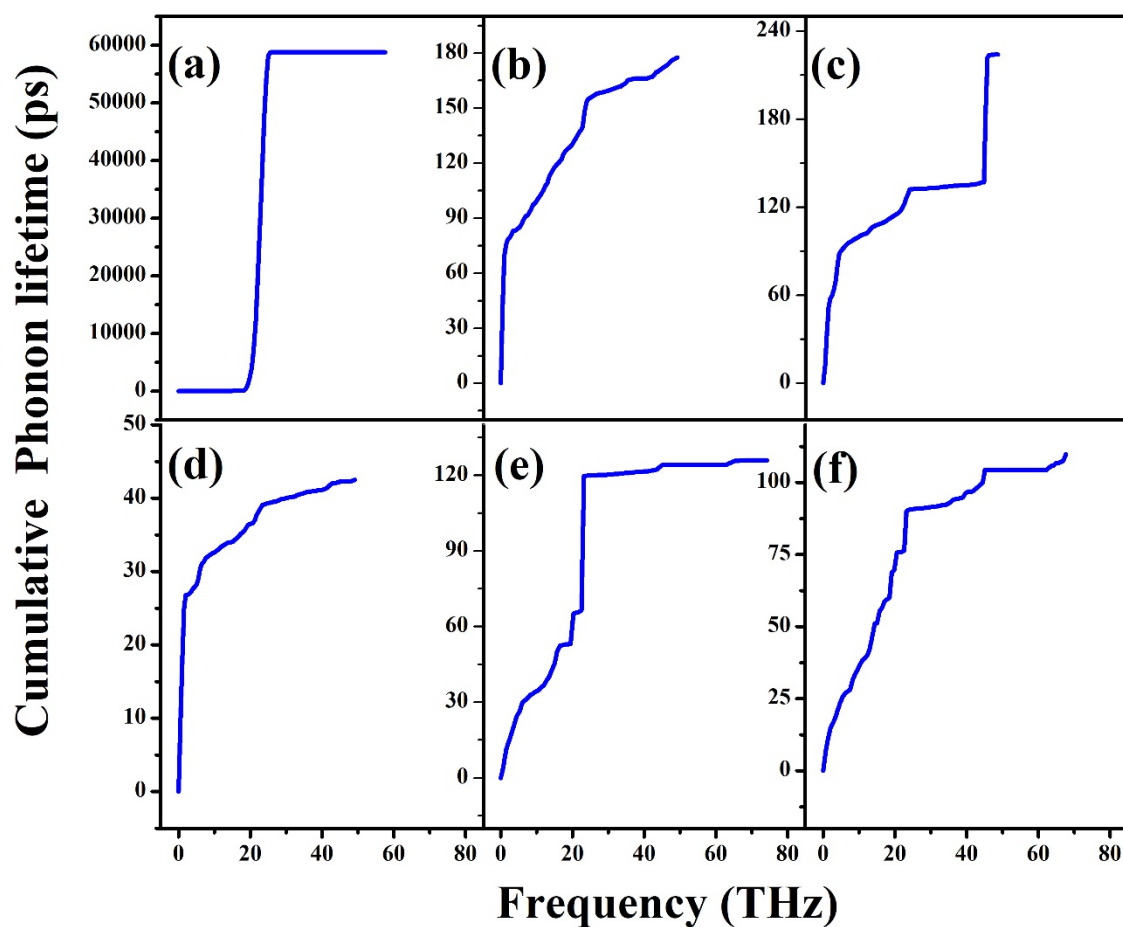

**Figure S4.** Cumulative phonon lifetime vs frequency plots for (a) graphene (b) haeckelite (c) pentahexoctite (d) s-graphene (e) 6.6.12-Gy and (f) delta-Gy.

5. **Table ST1:** Maximum and minimum phonon group velocity ( $v_g$ ) and the corresponding frequency for the materials

|                       |            | <b>ZA</b>        |           | <b>TA</b>        |           | <b>LA</b>        |           |
|-----------------------|------------|------------------|-----------|------------------|-----------|------------------|-----------|
|                       |            | <b>Frequency</b> | <b>GV</b> | <b>Frequency</b> | <b>GV</b> | <b>Frequency</b> | <b>GV</b> |
| <i>graphene</i>       | <b>Max</b> | 9.28             | 9.48      | 6.79             | 14.14     | 3.13             | 21.49     |
|                       | <b>Min</b> | 14.07            | 0.04      | 18.82            | 0.71      | 18.98            | 2.51      |
| <i>haeckelite</i>     | <b>Max</b> | 2.97             | 5.67      | 1.10             | 13.20     | 2.22             | 20.79     |
|                       | <b>Min</b> | 3.52             | 0.12      | 6.42             | 0.81      | 8.60             | 0.45      |
| <i>pentahexoctite</i> | <b>Max</b> | 3.40             | 6.34      | 1.11             | 13.64     | 5.19             | 20.71     |
|                       | <b>Min</b> | 0.22             | 1.45      | 7.29             | 3.71      | 8.83             | 3.30      |
| <i>s-graphene</i>     | <b>Max</b> | 0.13             | 6.64      | 2.80             | 12.72     | 1.87             | 19.66     |
|                       | <b>Min</b> | 1.73             | 0.79      | 5.28             | 0.18      | 6.94             | 0.71      |
| <b>6.6.12-Gy</b>      | <b>Max</b> | 1.43             | 4.07      | 0.66             | 9.74      | 1.83             | 17.01     |
|                       | <b>Min</b> | 1.11             | 1.55      | 2.18             | 0.75      | 2.31             | 0.72      |
| <i>delta-Gy</i>       | <b>Max</b> | 1.31             | 2.46      | 0.96             | 10.85     | 1.79             | 15.72     |
|                       | <b>Min</b> | 1.36             | 0.47      | 1.42             | 0.50      | 2.45             | 0.93      |

**6. Table ST2.** Comparison of experimental and theoretical TEC, TC (300 K) values with the present work

TEC and TC values of graphene at 300K

|            | Experimental                                                          | Theoretical                                                  | Present work                                        |
|------------|-----------------------------------------------------------------------|--------------------------------------------------------------|-----------------------------------------------------|
| <b>TEC</b> | $= (-8.0 \pm 0.7) \times 10^{-6} \text{ K}^{-1}$ (ref. 1)             | $= -6 \times 10^{-6} \text{ K}^{-1}$ (ref. 2)                | $= -6.85 \times 10^{-6} \text{ K}^{-1}$             |
| <b>TC</b>  | $= (3.1 \pm 1.0) \times 10^3 \text{ Wm}^{-1} \text{ K}^{-1}$ (ref. 3) | $= 3.00 \times 10^3 \text{ Wm}^{-1} \text{ K}^{-1}$ (ref. 4) | $= 3.01 \times 10^3 \text{ Wm}^{-1} \text{ K}^{-1}$ |

*References*

1. Yoon, D.; Son, Y.-W.; Cheong, H. Negative Thermal Expansion Coefficient of Graphene Measured by Raman Spectroscopy. *Nano Lett.* **2011**, *11* (8), 3227–3231.
2. Demiroglu, I.; Sevik, C. Extraordinary Negative Thermal Expansion of Two-Dimensional Nitrides: A Comparative Ab Initio Study of Quasiharmonic Approximation and Molecular Dynamics Simulations. *Phys. Rev. B Condens. Matter* **2021**, *103* (8), 085430.
3. Chen, S.; Moore, A. L.; Cai, W.; Suk, J. W.; An, J.; Mishra, C.; Amos, C.; Magnuson, C. W.; Kang, J.; Shi, L.; Ruoff, R. S. Raman Measurements of Thermal Transport in Suspended Monolayer Graphene of Variable Sizes in Vacuum and Gaseous Environments. *ACS Nano* **2011**, *5* (1), 321–328.
4. Das, G. P.; Raghuvanshi, P. R.; Bhattacharya, A. Phonons and Lattice Thermal Conductivities of Graphene Family. *Procedia Structural Integrity* **2019**, *23*, 334–341.

**7. Unit cell structures (POSCAR format) of the studied systems.**

```
(a) graphene
1.0000000000000000
2.4672320370031575 -0.0000000004273772 -0.0000000000000000
-1.2336163892563132 2.1366854086995160 0.0000000000000000
0.0000000000000000 0.0000000000000000 15.0000000000000000
C
2
Direct
0.3333333347903888 0.1666666682283378 0.5000000000000000
0.6666666652096112 0.8333333317716622 0.5000000000000000

(b) haeckelite
1.0000000000000000
4.7422514835752541 -0.1772202470086433 0.0000000000000000
1.3029163726511479 4.5631986420385013 0.0000000000000000
```



0.000000000000000 0.000000000000000 15.000000000000000  
 C  
 8  
 Direct  
 0.1165165178490953 0.5664050939946605 0.5000000000000000  
 0.8834834821509048 0.4335949060053393 0.5000000000000000  
 0.4335949056772205 0.8834835099442656 0.5000000000000000  
 0.5664050943227795 0.1165164900557343 0.5000000000000000  
 0.8791777669612355 0.1208222542476910 0.5000000000000000  
 0.1208222330387643 0.8791777457523088 0.5000000000000000  
 0.4069245558533477 0.4069246360524260 0.5000000000000000  
 0.5930754441466526 0.5930753639475739 0.5000000000000000

(c) Pentahectite

1.000000000000000  
 5.7814537259426535 0.1555488952776958 0.0000000000000000  
 -0.1026405360410348 3.8174814806819657 0.0000000000000000  
 0.0000000000000000 0.0000000000000000 15.000000000000000  
 C  
 8  
 Direct  
 0.7467525782518623 0.5956916616097984 0.5000000000000000  
 0.2044314217481356 0.2234483383901991 0.5000000000000000  
 0.3560338449142762 0.9095648332447354 0.5000000000000000  
 0.5951501550857288 0.9095761667552594 0.5000000000000000  
 0.9755909803939791 0.0904485668052296 0.5000000000000000  
 0.9755930196060187 0.7286914331947748 0.5000000000000000  
 0.7467503869904142 0.2234631499610985 0.5000000000000000  
 0.2044336130095907 0.5956778500389034 0.5000000000000000

(d) s\_graphene

1.000000000000000  
 5.8803821763419952 -0.0000000000000000 0.0000000000000000  
 0.0000000000000000 3.8904332791134602 0.0000000000000000  
 0.0000000000000000 0.0000000000000000 15.000000000000000  
 C  
 8  
 Direct  
 0.7417442779513623 0.8034085195930204 0.5000000000000000  
 0.2582557220486377 0.1965914804069796 0.5000000000000000  
 0.2582557220486377 0.8034085195930204 0.5000000000000000  
 0.7417442779513623 0.1965914804069796 0.5000000000000000  
 0.8790166847512445 0.5000000000000000 0.5000000000000000  
 0.1209833152487556 0.5000000000000000 0.5000000000000000  
 0.5000000000000000 0.1848210600721900 0.5000000000000000  
 0.5000000000000000 0.8151789399278100 0.5000000000000000

(e) 6,6,12-graphyne

1.000000000000000  
 9.4271667524014706 0.0000000000000002 0.0000000000000000  
 -0.0000000000000000 6.8981955867425802 0.0000000000000000  
 0.0000000000000000 0.0000000000000000 15.000000000000000  
 C  
 18  
 Direct

0.8690582460326451 0.8958567441619639 0.5000000000000000  
0.1309417539673544 0.1041432558380350 0.5000000000000000  
0.1309417539673544 0.8958567441619639 0.5000000000000000  
0.8690582460326451 0.1041432558380350 0.5000000000000000  
0.2592161817490509 0.2055606248952588 0.5000000000000000  
0.7407838182509487 0.7944393751047414 0.5000000000000000  
0.7407838182509487 0.2055606248952588 0.5000000000000000  
0.2592161817490509 0.7944393751047414 0.5000000000000000  
0.5000000000000000 0.6037338793575838 0.5000000000000000  
0.5000000000000000 0.3962661206424153 0.5000000000000000  
0.6278563803015278 0.2936757788500661 0.5000000000000000  
0.3721436196984722 0.7063242211499342 0.5000000000000000  
0.3721436196984722 0.2936757788500661 0.5000000000000000  
0.6278563803015278 0.7063242211499342 0.5000000000000000  
0.0000000000000000 0.2074092193736203 0.5000000000000000  
0.0000000000000000 0.7925907806263796 0.5000000000000000  
0.0000000000000000 0.4114039429882726 0.5000000000000000  
0.0000000000000000 0.5885960570117275 0.5000000000000000

(f) delta-graphyne

1.0000000000000000

9.4382892356694992 -0.0001021740193313 0.0000000000000000

-4.7192332531127690 8.1737473115761663 0.0000000000000000

0.0000000000000000 0.0000000000000000 15.0000000000000000

C

20

Direct

0.2479888621647248 0.4960069294472137 0.5000000000000000  
0.5039926438816121 0.7519938338753692 0.5000000000000000  
0.2480078310507812 0.7520089778259886 0.5000000000000000  
0.7520089778259337 0.2480078310507255 0.5000000000000000  
0.7519928338753750 0.5039916438816645 0.5000000000000000  
0.4960069294472507 0.2479888621647262 0.5000000000000000  
0.1728297015801106 0.3456589888092330 0.5000000000000000  
0.6543405157873690 0.8271656663462850 0.5000000000000000  
0.1728287988439925 0.8271751696779145 0.5000000000000000  
0.8271771696778449 0.1728307988439158 0.5000000000000000  
0.8271656663463243 0.6543405157874655 0.5000000000000000  
0.3456599888093603 0.1728307015801473 0.5000000000000000  
0.0879050157283477 0.9120936782444213 0.5000000000000000  
0.0879082562708266 0.1758130636260832 0.5000000000000000  
0.8241867020981755 0.9120920051735448 0.5000000000000000  
0.9120920051735651 0.8241867020981573 0.5000000000000000  
0.1758130636260572 0.0879082562708492 0.5000000000000000  
0.9120956782444457 0.0879070157283703 0.5000000000000000  
0.3333289386094838 0.6666704209584400 0.5000000000000000  
0.6666704209584263 0.3333289386094705 0.5000000000000000
